# Supplementary material for: Time Trends in Treatment Strategies and Survival of Older versus Younger Patients with Synchronous Metastasised Melanoma—A Population-Based Study in the Netherlands Cancer Registry
Source: MDPI journal article supplement (doi:10.3390/cancers14194904), 2022-10-07
Supplement: s1 [file s1]

**Table S1.** numbers of patients treated with immunotherapy.

| Year | <65      |        | 65-75    |        | >75      |        |
|------|----------|--------|----------|--------|----------|--------|
|      | <i>n</i> | (%)    | <i>n</i> | (%)    | <i>n</i> | (%)    |
| 2000 | 6        | (11.8) | 0        | (0.0)  | 0        | (0.0)  |
| 2001 | 4        | (7.0)  | 0        | (0.0)  | 0        | (0.0)  |
| 2002 | 3        | (4.3)  | 0        | (0.0)  | 0        | (0.0)  |
| 2003 | 1        | (1.5)  | 1        | (4.8)  | 0        | (0.0)  |
| 2004 | 1        | (1.6)  | 0        | (0.0)  | 0        | (0.0)  |
| 2005 | 1        | (1.3)  | 0        | (0.0)  | 0        | (0.0)  |
| 2006 | 1        | (1.6)  | 0        | (0.0)  | 0        | (0.0)  |
| 2007 | 2        | (2.6)  | 0        | (0.0)  | 0        | (0.0)  |
| 2008 | 1        | (1.3)  | 0        | (0.0)  | 0        | (0.0)  |
| 2009 | 1        | (1.2)  | 0        | (0.0)  | 0        | (0.0)  |
| 2010 | 4        | (4.1)  | 1        | (3.1)  | 1        | (3.2)  |
| 2011 | 9        | (10.2) | 0        | (0.0)  | 0        | (0.0)  |
| 2012 | 5        | (7.1)  | 1        | (2.3)  | 1        | (2.9)  |
| 2013 | 5        | (6.8)  | 3        | (7.0)  | 0        | (0.0)  |
| 2014 | 22       | (25.3) | 12       | (25.0) | 2        | (5.6)  |
| 2015 | 37       | (39.4) | 21       | (43.8) | 8        | (23.5) |
| 2016 | 30       | (34.1) | 17       | (27.9) | 14       | (31.8) |
| 2017 | 32       | (42.7) | 23       | (37.7) | 7        | (13.5) |
| 2018 | 44       | (50.0) | 31       | (50.8) | 18       | (35.3) |

**Table S2.** numbers of patients treated with targeted therapy.

| Year | <65      |        | 65-75    |        | >75      |        |
|------|----------|--------|----------|--------|----------|--------|
|      | <i>n</i> | (%)    | <i>n</i> | (%)    | <i>n</i> | (%)    |
| 2000 | 0        | (0.0)  | 0        | (0.0)  | 0        | (0.0)  |
| 2001 | 0        | (0.0)  | 0        | (0.0)  | 0        | (0.0)  |
| 2002 | 0        | (0.0)  | 0        | (0.0)  | 0        | (0.0)  |
| 2003 | 0        | (0.0)  | 0        | (0.0)  | 0        | (0.0)  |
| 2004 | 0        | (0.0)  | 0        | (0.0)  | 0        | (0.0)  |
| 2005 | 0        | (0.0)  | 0        | (0.0)  | 0        | (0.0)  |
| 2006 | 1        | (1.6)  | 0        | (0.0)  | 0        | (0.0)  |
| 2007 | 0        | (0.0)  | 0        | (0.0)  | 0        | (0.0)  |
| 2008 | 1        | (1.3)  | 0        | (0.0)  | 0        | (0.0)  |
| 2009 | 0        | (0.0)  | 0        | (0.0)  | 0        | (0.0)  |
| 2010 | 1        | (1.0)  | 0        | (0.0)  | 0        | (0.0)  |
| 2011 | 7        | (8.0)  | 1        | (2.6)  | 0        | (0.0)  |
| 2012 | 9        | (12.9) | 8        | (18.2) | 5        | (14.7) |
| 2013 | 18       | (24.3) | 9        | (20.9) | 2        | (5.9)  |
| 2014 | 25       | (28.7) | 9        | (18.8) | 4        | (11.1) |
| 2015 | 25       | (26.6) | 13       | (27.1) | 4        | (11.8) |
| 2016 | 27       | (30.7) | 14       | (23.0) | 3        | (6.8)  |
| 2017 | 27       | (36.0) | 9        | (14.8) | 5        | (9.6)  |
| 2018 | 25       | (28.4) | 13       | (21.3) | 5        | (9.8)  |
